# Supplementary material for: Understanding the Compound Flood Risk along the Coast of the Contiguous United States
Source: Copernicus journal article supplement (doi:10.5194/hess-2023-31), 2023-02-02
Supplement: Supplementary file 1 [file hess-2023-31-supplement.pdf]

Supporting Information for

**Understanding the Compound Flood Risk along the Coast of the Contiguous United States**

Dongyu Feng<sup>1</sup>, Zeli Tan<sup>1\*</sup>, Donghui Xu<sup>1</sup>, L. Ruby Leung<sup>1</sup>

<sup>1</sup>Atmospheric Sciences and Global Change Division, Pacific Northwest National Laboratory, Richland, WA, USA

\*Correspondence to: Zeli Tan (zeli.tan@pnnl.gov)

**Contents of this file**

Tables S1  
Figures S1 to S8

**Introduction**

This supporting material contains a table showing the information of paired USGS gauges and NOAA tidal gauges for uncertainty analysis (Table S1). We also provide eight figures including the MOSART streamflow validation (Fig. S1), GTSM water level validation (Fig. S2) and model-data comparison to identify potential CFRA uncertainties at example river basins in Figures S3-S7, and the spatial map of joint exceedance probability ( $P_{Q,SS}$ ) with magnified view at a few representative regions (Fig. S8).

**Table S1. Paired USGS and NOAA gauges for uncertainty analysis.**

| <b>No.</b> | <b>USGS</b> | <b>Latitude and Longitude</b> | <b>NOAA</b> | <b>Latitude and Longitude</b> |
|------------|-------------|-------------------------------|-------------|-------------------------------|
| 1          | 01034500    | 45.2361, -68.6514             | 8413320     | 44.3922, -68.2043             |
| 2          | 01049265    | 44.4722, -69.6839             | 8418150     | 43.6581, -70.2442             |
| 3          | 01066000    | 43.8081, -70.7817             | 8418150     | 43.6581, -70.2442             |
| 4          | 01113895    | 41.8884, -71.3814             | 8452660     | 41.5050, -71.3267             |
| 5          | 01122500    | 41.7004, -72.1820             | 8461490     | 41.3614, -72.0900             |
| 6          | 01184000    | 41.9375, -72.6850             | 8461490     | 41.3614, -72.0900             |
| 7          | 01389500    | 40.8847, -74.2261             | 8518750     | 40.7006, -74.0142             |
| 8          | 01403060    | 40.5511, -74.5483             | 8531680     | 40.4669, -74.0094             |
| 9          | 01576754    | 39.9465, -76.3677             | 8574680     | 39.2667, -76.5783             |
| 10         | 02037500    | 37.5632, -77.5469             | 8638610     | 36.9467, -76.3300             |
| 11         | 02105769    | 34.4044, -78.2936             | 8658120     | 34.2275, -77.9536             |
| 12         | 02175000    | 33.0279, -80.3915             | 8665530     | 32.7808, -79.9236             |
| 13         | 02198500    | 32.5286, -81.2683             | 8670870     | 32.0367, -80.9017             |
| 14         | 02202500    | 32.1901, -81.4159             | 8670870     | 32.0367, -80.9017             |
| 15         | 02228000    | 31.1900, -81.9358             | 8720030     | 30.6714, -81.4658             |
| 16         | 02246025    | 30.0825, -81.8094             | 8720218     | 30.3982, -81.4279             |
| 17         | 02323592    | 29.3394, -83.0865             | 8727520     | 29.1350, -83.0317             |
| 18         | 02376033    | 30.6702, -87.2669             | 8729840     | 30.4044, -87.2112             |
| 19         | 08068500    | 30.1105, -95.4363             | 8771450     | 29.3100, -94.7933             |
| 20         | 08189500    | 28.2920, -97.2792             | 8774770     | 28.0217, -97.0467             |
| 21         | 11530500    | 41.4340, -123.9350            | 9419750     | 41.7450, -124.1830            |
| 22         | 11532500    | 41.7915, -124.0762            | 9419750     | 41.7450, -124.1830            |
| 23         | 12113000    | 47.3146, -122.0601            | 9449880     | 48.5453, -123.0129            |
| 24         | 12150800    | 47.8309, -122.0485            | 9449880     | 48.5453, -123.0129            |
| 25         | 12213100    | 48.8448, -122.5893            | 9449880     | 48.5453, -123.0129            |
| 26         | 14243000    | 46.2748, -122.9146            | 9439040     | 46.2073, -123.7683            |

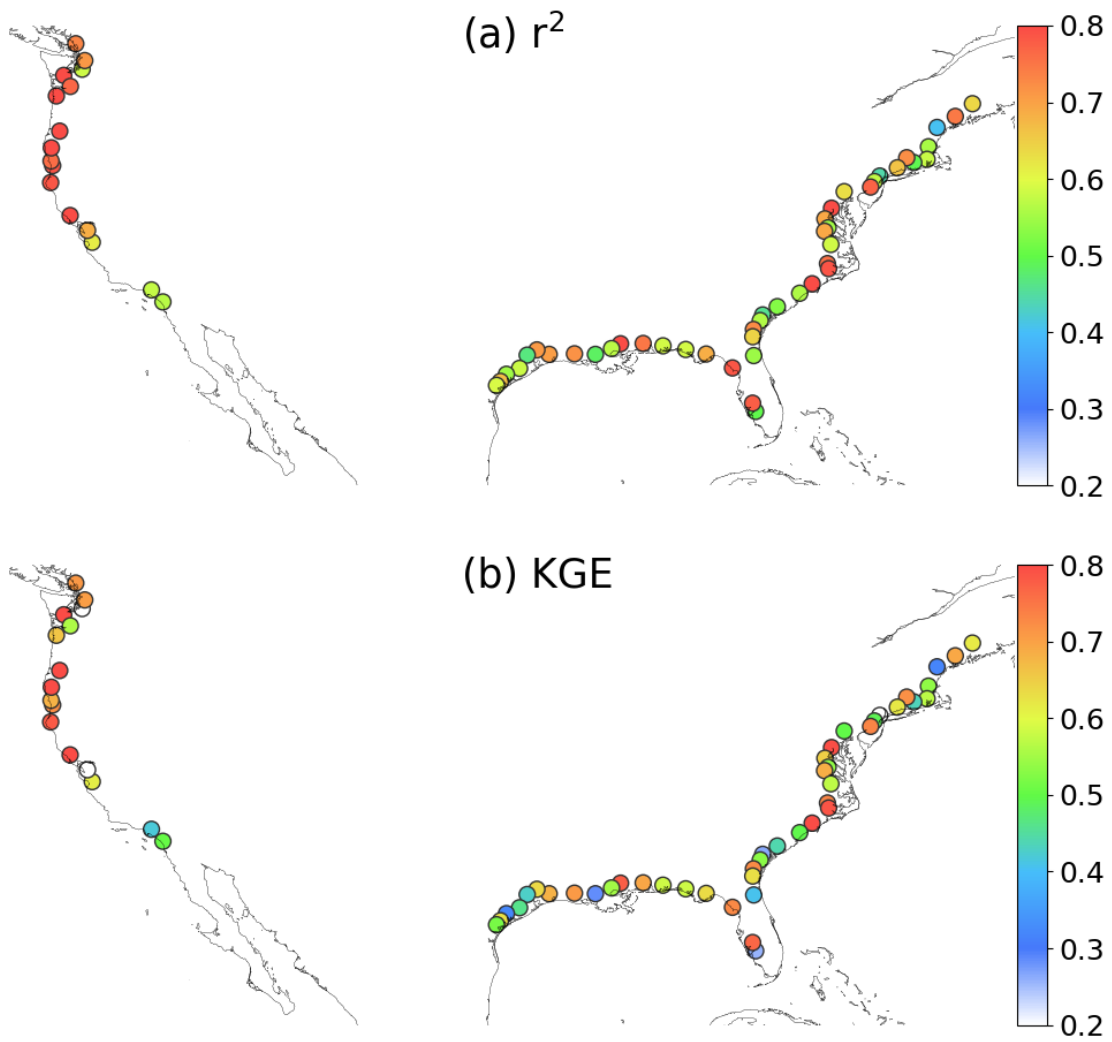

**Figure S1.** The evaluation of the MOSART simulated streamflow at the selected USGS gauges near the CONUS coastline using: (a) coefficient of determination  $r^2$ ; (b) Kling-Gupta efficiency (KGE) (Gupta et al., 2009).

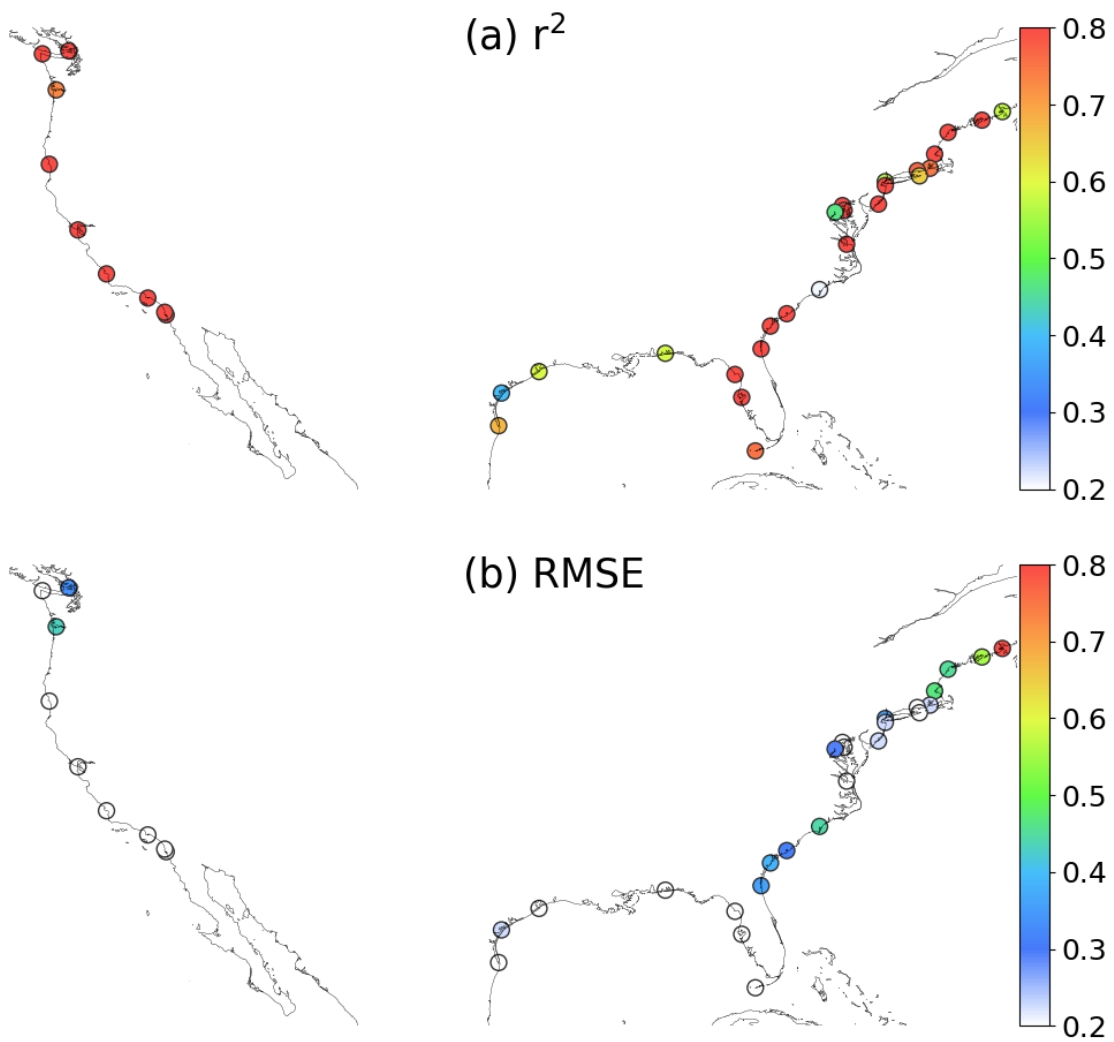

**Figure S2.** The evaluation of the GTSM modeled total water level at the selected NOAA tidal gauges near the US coastline using: (a) coefficient of determination  $r^2$ ; (b) root mean squared error (RMSE).

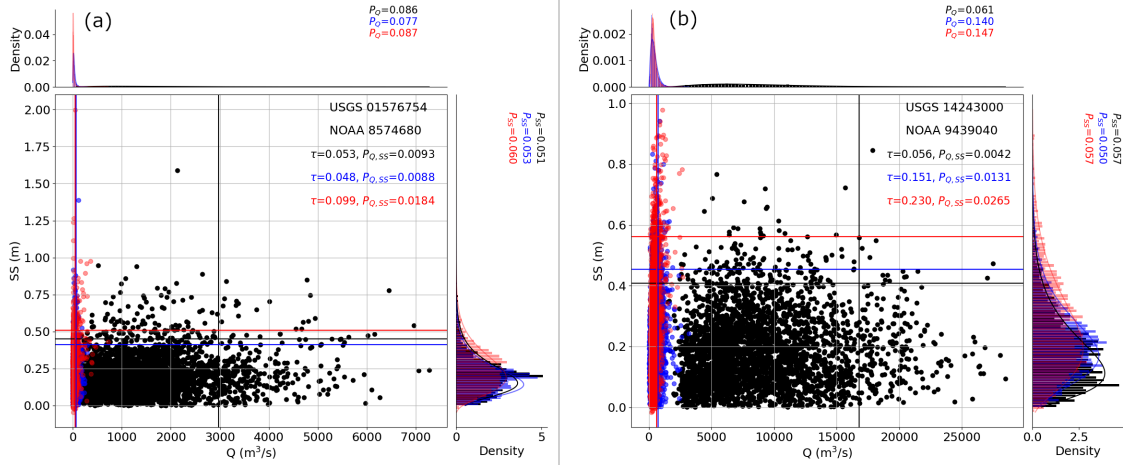

**Figure S3.** Epistemic uncertainty caused by the inappropriate USGS gauge locations. The uncertainty is identified by model-data comparison at the river basins corresponding to USGS gauge 01576754 and 14243000.

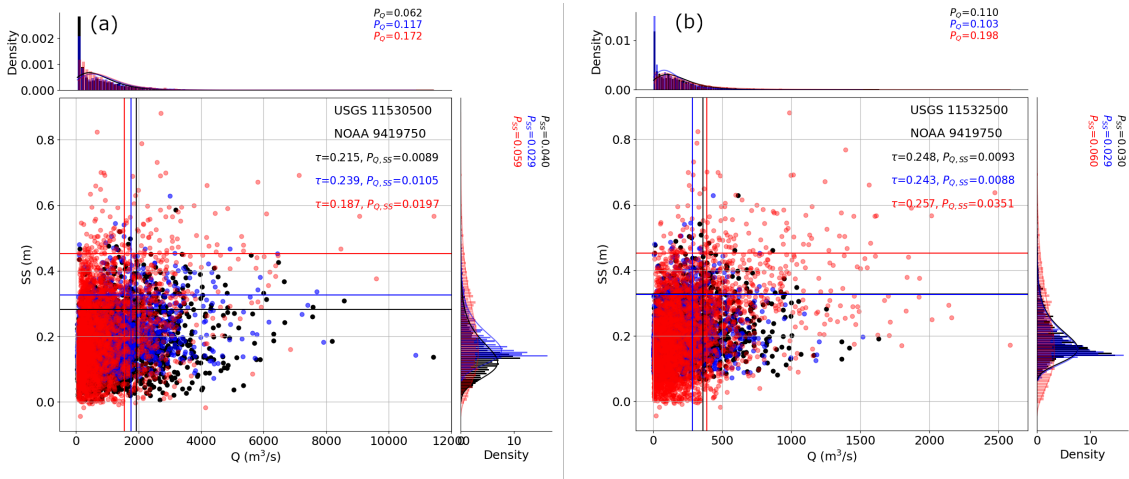

**Figure S4.** Epistemic uncertainty caused by the inappropriate NOAA gauge locations. The uncertainty is identified by model-data comparison at the river basins corresponding to USGS gauge 11530500 and 11532500.

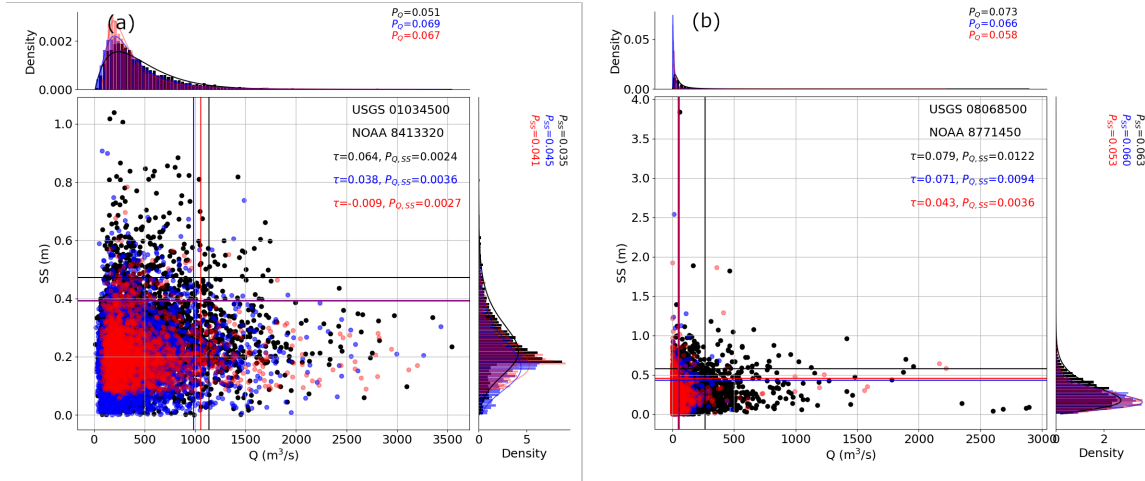

**Figure S5.** Aleatory uncertainty due to the variability in  $Q$ . The uncertainty is identified by model-data comparison at the river basins corresponding to USGS gauge 01034500 and 08068500.

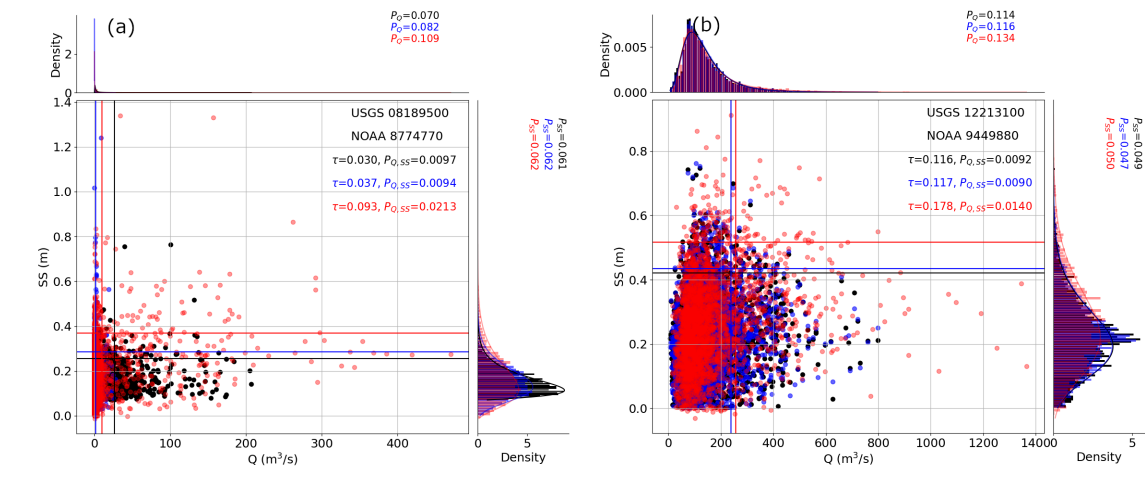

**Figure S6.** Epistemic uncertainty due to the underestimation of SS peaks in GTSM. The uncertainty is identified by model-data comparison at the river basins corresponding to USGS gauge 08189500 and 12213100.

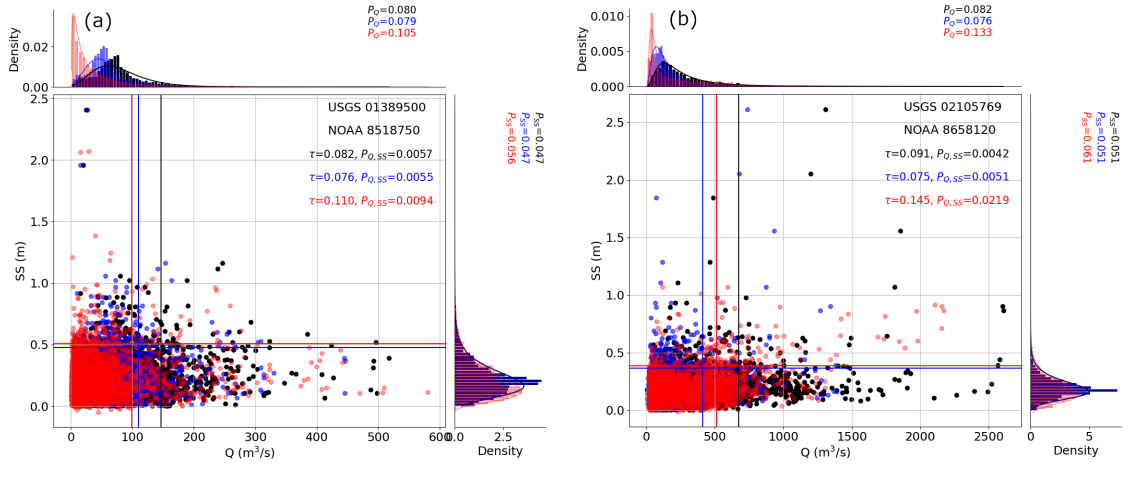

**Figure S7.** Epistemic uncertainty due to the reduced MOSART performance. The uncertainty is identified by model-data comparison at the river basins corresponding to USGS gauge 01389500 and 02105709.

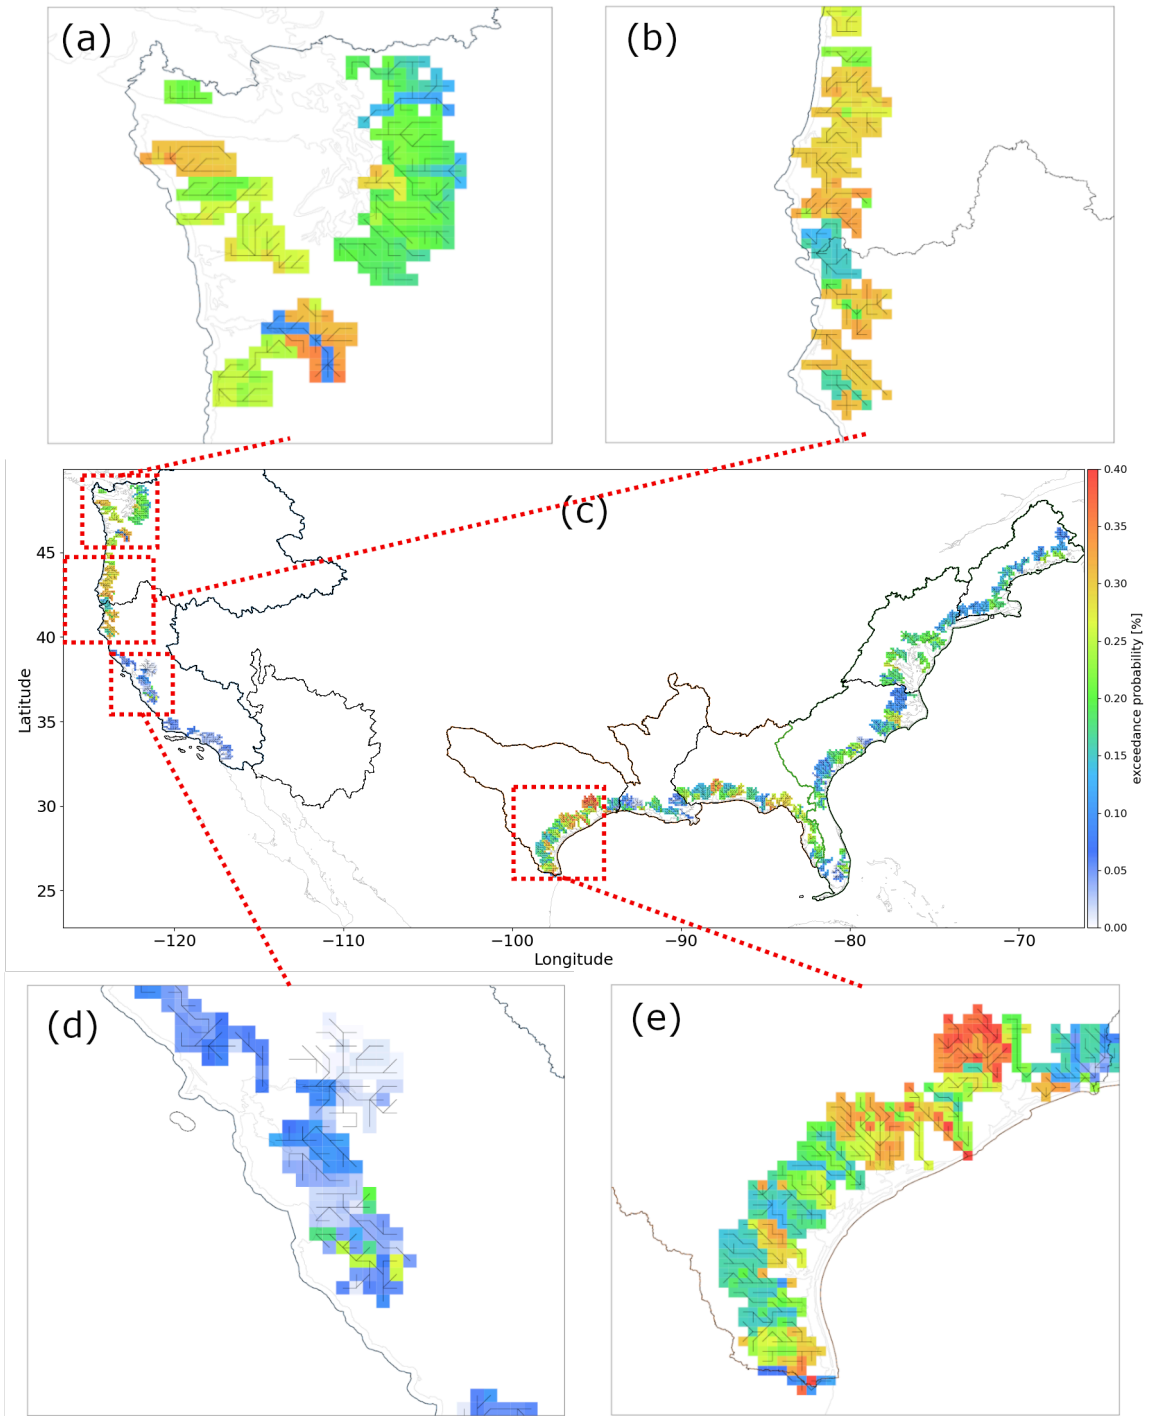

**Figure S8.** The joint exceedance probability ( $P_{Q,SS}$ ) in CONUS with magnified views at four representative regions where  $P_{Q,SS}$  is significantly different in the mainstem than its tributaries.



## References

Gupta, H. V., Kling, H., Yilmaz, K. K., and Martinez, G. F.: Decomposition of the mean squared error and NSE performance criteria: Implications for improving hydrological modelling, *Journal of hydrology*, 377, 80-91, 10.1016/j.jhydrol.2009.08.003, 2009.
